# Supplementary figures and images for: Transcriptional Read-Through Induction Treatment Trial in Intestinal Failure Induced by anEpCAMNonsense Mutation
Source: Hindawi journal article supplement (doi:10.1155/2012/173195), 2012-01-01

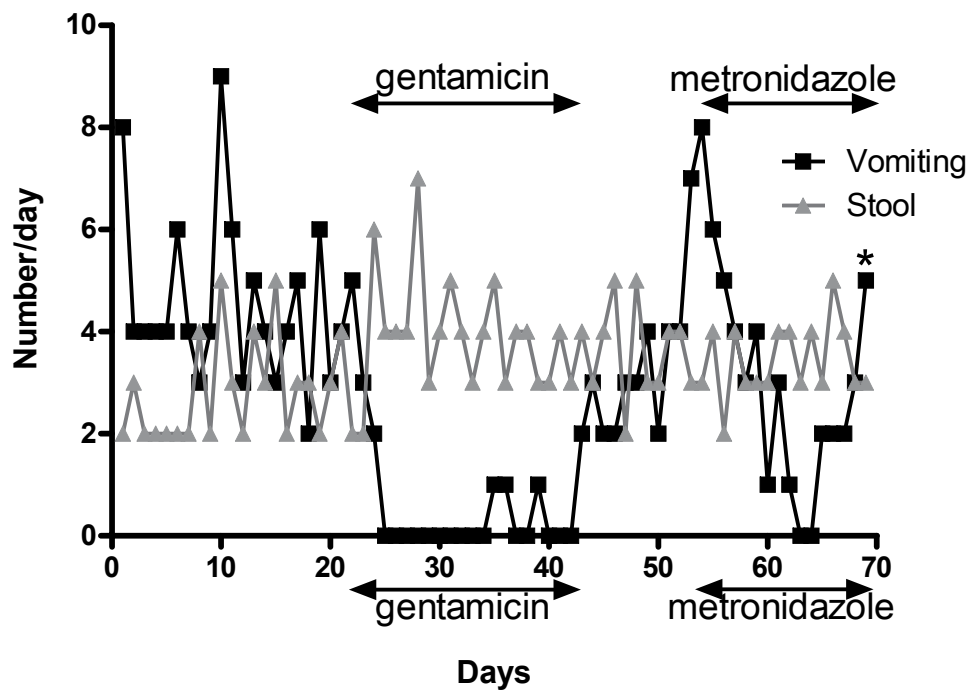

Supplement: f1 [file 173195.f1.pdf]
